# Supplementary material for: Rapid Reductions in Breast Density following Tamoxifen Therapy as Evaluated by Whole-Breast Ultrasound Tomography
Source: MDPI journal article supplement (doi:10.3390/jcm11030792), 2022-02-01
Supplement: s1 [file s1]

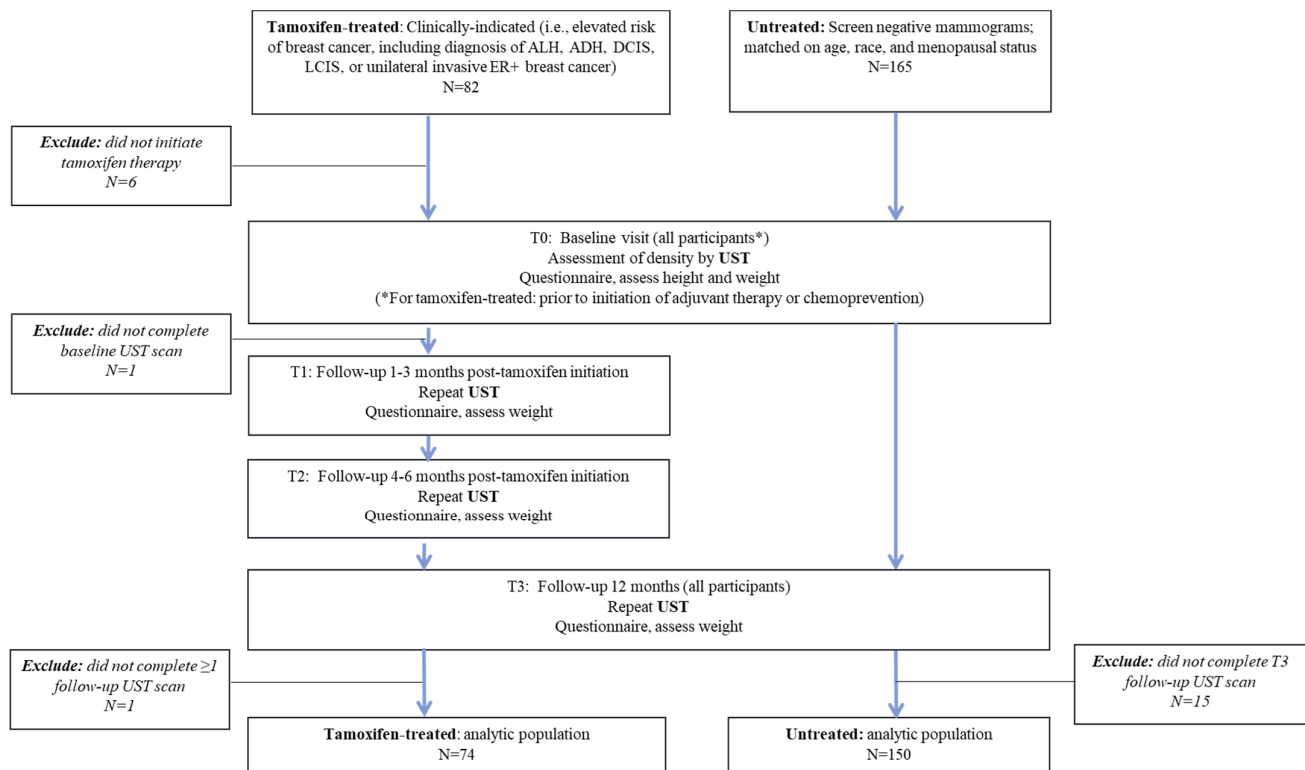

**Supplementary Figure S1.** Overview of study visits and exclusion criteria, the Ultrasound Study of Tamoxifen.

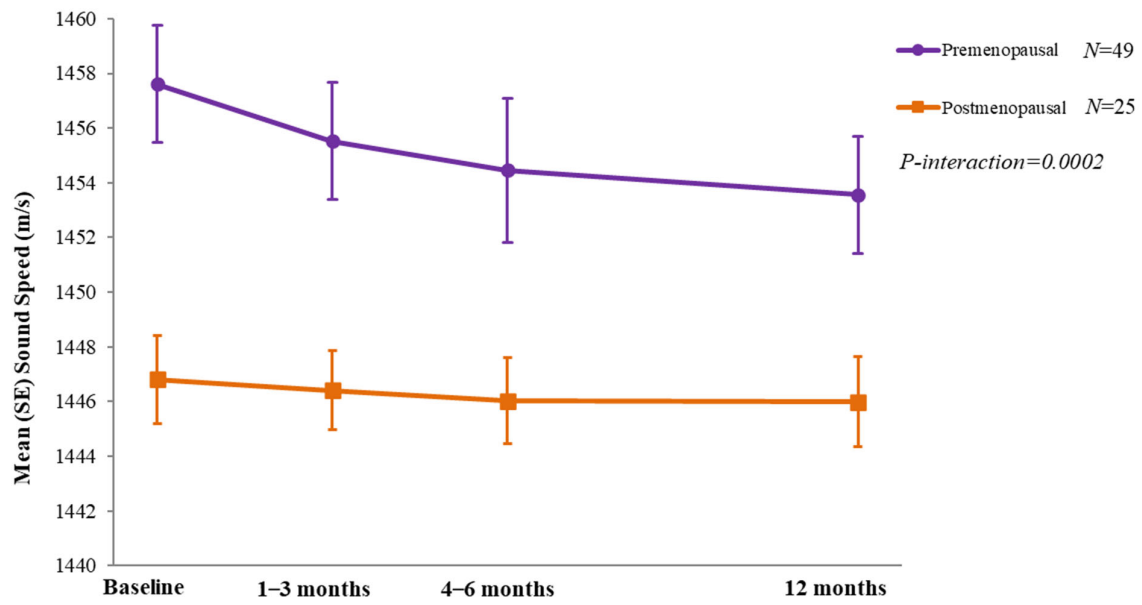

**Supplementary Figure S2.** Mean (SE) reductions in breast volume average sound speed by menopausal status in the tamoxifen-treated group (N=74), the Ultrasound Study of Tamoxifen
